# Supplementary material for: Characterization of the Lower Airways and Oral Microbiota in Healthy Young Persons in the Community
Source: MDPI journal article supplement (doi:10.3390/biomedicines11030841), 2023-03-10
Supplement: s1 [file s1]

# Characterization of the Lower Airways and Oral Microbiota in Healthy Young Persons in the Community

**Fernando Sergio Leitao Filho <sup>1,2</sup>, Carli Monica Peters <sup>3</sup>, Andrew William Sheel <sup>3</sup>, Julia Yang <sup>1,2</sup>, Corey Nislow <sup>4</sup>, Stephen Lam <sup>1,2,5</sup>, Janice M. Leung <sup>1,2</sup> and Don D. Sin <sup>1,2,\*</sup>**

<sup>1</sup> UBC Centre for Heart Lung Innovation, St. Paul's Hospital, 1081 Burrard Street, Room 166, Vancouver, BC V6Z 1Y6, Canada; fernando.studart@hli.ubc.ca (F.S.L.F.);

julia.yang@hli.ubc.ca (J.Y.); slam2@bccancer.bc.ca (S.L.); janice.leung@hli.ubc.ca (J.M.L.)

<sup>2</sup> Division of Respiratory Medicine, Department of Medicine, University of British Columbia, Vancouver, BC V1V 1V7, Canada

<sup>3</sup> School of Kinesiology, Faculty of Education, University of British Columbia, Vancouver, BC V5Z 1M9, Canada; carli.peters@hli.ubc.ca (C.M.P.); bill.sheel@ubc.ca (A.W.S.)

<sup>4</sup> Faculty of Pharmaceutical Sciences, University of British Columbia, Vancouver, BC V1V 1V7, Canada; corey.nislow@ubc.ca

<sup>5</sup> British Columbia Cancer Agency, Vancouver, BC V5Z 4E6, Canada

\* Correspondence: don.sin@hli.ubc.ca; Tel.: +1-(604)-806-8395; Fax: +1-(604)-806-8722

## **DNA extraction and PCR amplification**

DNA was extracted from 500  $\mu$ L sample aliquots using the DNeasy Blood & Tissue Kit (QIAGEN<sup>®</sup>, Toronto, ON, Canada). Each aliquot was centrifuged for 10 minutes at  $5000 \times g$  to form a pellet. After the supernatant was discarded, the pellet was resuspended in 180  $\mu$ L of Buffer ATL and DNA was extracted according to the manufacturer's instructions. The concentration of DNA was measured using the Quant-iT<sup>®</sup> High-Sensitivity dsDNA Assay Kit (Life Technologies, Carlsbad, CA, USA).

Total 16S rRNA libraries were quantified using a droplet digital PCR assay (Bio-Rad Laboratories<sup>®</sup>, Mississauga, Canada). PCR amplification was performed using the AccuPrime<sup>®</sup> Taq DNA Polymerase System (Life Technologies<sup>®</sup>, Carlsbad, CA, USA). Primers targeting the variable V4 region of the 16S rRNA gene were used.

Each 20  $\mu$ L PCR reaction contained 20 pmol of each indexed primer, 2  $\mu$ L of  $10\times$  PCR Buffer II, 0.15  $\mu$ L of Taq DNA Polymerase, and 20 ng of DNA template. PCR reactions were placed in a T100 Thermal Cycler (Bio-Rad Laboratories<sup>®</sup>, Mississauga, ON, Canada). The touchdown PCR program was as follows: 95°C for 2 min; 20 cycles of 95°C for 20 s, 60°C for 15 s (decreasing by 0.3°C per cycle), and 72°C for 90 s; 20 cycles of 95°C for 20 s, 55°C for 15 s, and 72°C for 90 s; and, lastly, 72°C for 5 min. The size of the obtained amplicons was checked by gel electrophoresis with a 1.5% agarose gel containing SYBR Safe DNA Gel Stain (Life Technologies<sup>®</sup>, Carlsbad, CA, USA). The presence of a band on the agarose gel indicated successful amplification. Before pooling the PCR amplicons, cleanup and normalization were performed using the SequalPrep<sup>®</sup> Normalization Plate Kit (Applied Biosystems<sup>®</sup>, Frederick, MD, USA). The pool of PCR reaction products was checked for size and quality using a DNA 1000 Kit with the 2100 Bioanalyzer system (Agilent Technologies<sup>®</sup>, Santa Clara, CA, USA) and diluted to 4 nM with 10 mM Tris-Cl pH 8.5 before sequencing.

## **Sequencing accuracy**

A mock community (HM-782D) containing 20 bacterial species was provided to evaluate the sequence quality (BEI Resources<sup>®</sup>, Virginia, USA). According to the *qiime quality-control evaluate-seqs* plugin function [1], we detected only 5 mismatches and no gaps (identified in only 2/20 ASVs from our MOCK community), resulting in a sequencing accuracy of ~99.5%.

**Table S1:** Taxonomic annotations at the phylum and genus levels for amplicon sequence variants (ASVs) identified as potential contaminants according to the Decontam R package.

| ASV   | Phylum                   | Genus                                 | Species                         |
|-------|--------------------------|---------------------------------------|---------------------------------|
| ASV1  | <i>Proteobacteria</i>    | <i>Escherichia-Shigella</i>           | NA                              |
| ASV2  | <i>Cyanobacteria</i>     | <i>Chloroplast</i>                    | NA                              |
| ASV3  | <i>Cyanobacteria</i>     | <i>Chloroplast</i>                    | NA                              |
| ASV4  | <i>Proteobacteria</i>    | <i>Sphingomonas</i>                   | NA                              |
| ASV5  | <i>Proteobacteria</i>    | NA                                    | NA                              |
| ASV6  | <i>Proteobacteria</i>    | <i>Tepidiphilus</i>                   | <i>uncultured bacterium</i>     |
| ASV7  | <i>Firmicutes</i>        | <i>Mogibacterium</i>                  | <i>uncultured rumen</i>         |
| ASV8  | <i>Actinobacteriota</i>  | <i>Corynebacterium</i>                | NA                              |
| ASV9  | <i>Verrucomicrobiota</i> | <i>Chthoniobacter</i>                 | NA                              |
| ASV10 | <i>Patescibacteria</i>   | <i>Candidatus Lloydbacteria</i>       | <i>Candidatus Lloydbacteria</i> |
| ASV11 | <i>Firmicutes</i>        | <i>Mogibacterium</i>                  | <i>uncultured rumen</i>         |
| ASV12 | <i>Cyanobacteria</i>     | <i>Chloroplast</i>                    | NA                              |
| ASV13 | <i>Proteobacteria</i>    | <i>Brevundimonas</i>                  | NA                              |
| ASV14 | <i>Proteobacteria</i>    | <i>Bosea</i>                          | NA                              |
| ASV15 | <i>Proteobacteria</i>    | <i>Legionella</i>                     | NA                              |
| ASV16 | <i>Proteobacteria</i>    | <i>Neisseria</i>                      | NA                              |
| ASV17 | <i>Verrucomicrobiota</i> | <i>Candidatus Xiphinematobacter</i>   | <i>uncultured Candidatus</i>    |
| ASV18 | <i>Bdellovibrionota</i>  | <i>Oligoflexus</i>                    | <i>metagenome</i>               |
| ASV19 | <i>Proteobacteria</i>    | <i>Methylobacterium-Methylorubrum</i> | NA                              |
| ASV20 | <i>Proteobacteria</i>    | <i>Pedomicrobium</i>                  |                                 |
| ASV21 | <i>Patescibacteria</i>   | <i>Candidatus Nomurabacteria</i>      | <i>uncultured bacterium</i>     |
| ASV22 | <i>Patescibacteria</i>   | <i>Candidatus Azambacteria</i>        | <i>Parcubacteria bacterium</i>  |
| ASV23 | <i>Bacteroidota</i>      | <i>Porphyromonas</i>                  | <i>uncultured bacterium</i>     |
| ASV24 | <i>Campylobacterota</i>  | <i>Campylobacter</i>                  | NA                              |
| ASV25 | <i>Firmicutes</i>        | <i>Butyrivibrio</i>                   | <i>Eubacterium sp.</i>          |
| ASV26 | <i>Bacteroidota</i>      | <i>Prevotella-7</i>                   | <i>Prevotella enoea</i>         |
| ASV27 | <i>Cyanobacteria</i>     | <i>Chloroplast</i>                    | NA                              |
| ASV28 | <i>Firmicutes</i>        | <i>Parvimonas</i>                     | <i>uncultured bacterium</i>     |
| ASV29 | <i>Bacteroidota</i>      | <i>Tannerella</i>                     | <i>uncultured bacterium</i>     |
| ASV30 | <i>Desulfobacterota</i>  | <i>Desulfobulbus</i>                  | NA                              |

\*Includes both control and clinical samples, as follows: 1) clinical samples: bronchial brushings, n=25; bronchoalveolar lavage (BAL) samples, n=25; oral wash samples, n=25; 2) control samples: extraction negatives, n=5; bronchoscope channel washes, n=23; CytoLyt controls, n=25. The “frequency” method in the Decontam R package [2] was used to identify possible contaminants; in this method, the frequency distribution of each sequencing feature as a function of the input DNA concentration is used to identify contaminants. Legend: NA = not applicable.

**Figure S1:** Comparison of microbial structures (beta-diversity) between clinical samples (BB, BAL, and OW) and control samples (EN, NTC, BCW, and CC).

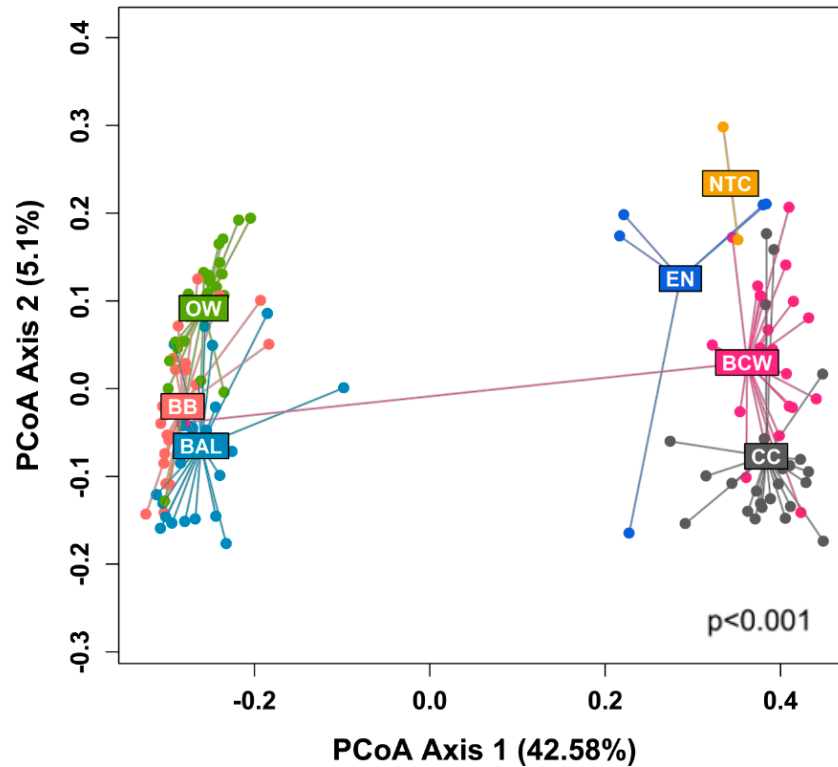

Permutational Multivariate Analysis of Variance (PERMANOVA; function `adonis` in the `vegan` R package [3]) based on Generalized Unifrac distance ( $\alpha=0.5$ ) [4] was used for comparison of microbial structures among specimen types. Legend: PCoA = Principal Coordinates Analysis; BB = bronchial brushing ( $n=25$ ); BAL = bronchoalveolar lavage ( $n=25$ ); OW = oral wash ( $n=25$ ); BCW = bronchoscope channel wash ( $n=23$ ); EN = extraction negative ( $n=5$ ); NTC = non-template control ( $n=2$ ); CC = CytoLyt controls ( $n=25$ ). The BCW controls were retrieved by flushing 40 mL of sterile 0.9% saline through the bronchoscope before the procedure into a sterile specimen cup. The EN controls contained only DNA extraction reagents, whereas NTC consisted of ultra-purified water instead of a DNA sample during the PCR reaction, and the CC controls contained only CytoLyt® solution. Pairwise PERMANOVA results are displayed in Table S2.

**Table S2:** Pairwise PERMANOVA results based on a Generalized Unifrac distance considering clinical samples (n=75) and control samples (n=55).

| <b>Group 1</b> | <b>Group 2</b> | <b>Sample size</b> | <b>Permutations</b> | <b><i>p-value</i></b> | <b><i>adj. p-value</i></b> |
|----------------|----------------|--------------------|---------------------|-----------------------|----------------------------|
| BAL            | BB             | 50                 | 999                 | 0.009                 | 0.01                       |
| BAL            | BCW            | 48                 | 999                 | 0.001                 | 0.002                      |
| BAL            | CC             | 50                 | 999                 | 0.001                 | 0.002                      |
| BAL            | EN             | 30                 | 999                 | 0.001                 | 0.002                      |
| BAL            | OW             | 50                 | 999                 | 0.001                 | 0.002                      |
| BAL            | NTC            | 27                 | 999                 | 0.003                 | 0.005                      |
| BB             | BCW            | 48                 | 999                 | 0.001                 | 0.002                      |
| BB             | CC             | 50                 | 999                 | 0.001                 | 0.002                      |
| BB             | EN             | 30                 | 999                 | 0.001                 | 0.002                      |
| BB             | OW             | 50                 | 999                 | 0.001                 | 0.002                      |
| BB             | NTC            | 27                 | 999                 | 0.002                 | 0.003                      |
| BCW            | CC             | 48                 | 999                 | 0.001                 | 0.002                      |
| BCW            | EN             | 28                 | 999                 | 0.013                 | 0.013                      |
| BCW            | OW             | 48                 | 999                 | 0.001                 | 0.002                      |
| BCW            | NTC            | 25                 | 999                 | 0.006                 | 0.007                      |
| CC             | EN             | 30                 | 999                 | 0.005                 | 0.007                      |
| CC             | OW             | 50                 | 999                 | 0.001                 | 0.002                      |
| CC             | NTC            | 27                 | 999                 | 0.008                 | 0.009                      |
| EN             | OW             | 30                 | 999                 | 0.001                 | 0.002                      |
| EN             | NTC            | 7                  | 999                 | 0.493                 | 0.49                       |
| OW             | NTC            | 27                 | 999                 | 0.004                 | 0.006                      |

Legend: BB = bronchial brushing (n=25); BAL = bronchoalveolar lavage (n=25); OW = oral wash (n=25); BCW = bronchoscope channel wash (n=23); EN = extraction negative (n=5); NTC = non-template control (n=2); CC = CytoLyt control (n=25). p-values were based on the Permutational analysis of variance (PERMANOVA) method [5], and pairwise PERMANOVA results were obtained according to the Benjamini-Hochberg method [6]. The PERMANOVA results were obtained directly from QIIME 2™ (based on the qiime diversity plugin) .

**Table S3:** Most abundant bacterial species identified in each microbiome compartment.

| Bronchial Brushings                 |      |        |           | BAL samples |        |            | Oral Wash samples |        |            |
|-------------------------------------|------|--------|-----------|-------------|--------|------------|-------------------|--------|------------|
| Species                             | Mean | Median | Q1; Q3    | Mean        | Median | Q1; Q3     | Mean              | Median | Q1; Q3     |
| <i>Veillonella dispar</i> *         | 14.0 | 14.7   | 9.2; 7.9  | 16.1        | 15.5   | 13.9; 18.1 | 15.5              | 15.0   | 11.4; 16.8 |
| <i>Haemophilus parainfluenzae</i> * | 4.2  | 3.1    | 1.7; 6.2  | 6.3         | 5.5    | 4.5; 7.2   | 15.3              | 16.3   | 11.7; 18.7 |
| <i>Prevotella jejuni</i> *          | 12.0 | 9.6    | 5.9; 17.5 | 9.2         | 8.8    | 6.9; 11.9  | 6.9               | 5.4    | 3.8; 18.7  |
| <i>Prevotella melaninogenica</i>    | 7.4  | 7.0    | 2.6; 10.9 | 7.8         | 7.0    | 4.1; 9.1   | 11.1              | 10.9   | 6.7; 12.5  |
| <i>Prevotella pallens</i>           | 8.4  | 6.1    | 3.1; 9.7  | 6.7         | 5.8    | 3.9; 9.3   | 5.4               | 4.0    | 3.1; 7.9   |
| <i>Megasphaera micronuciformis</i>  | 3.0  | 2.7    | 0.3; 4.2  | 2.3         | 2.4    | 1.5; 3.2   | 0.6               | 0.5    | 0.2; 0.8   |
| <i>Prevotella salivae</i>           | 2.5  | 2.1    | 1.0; 3.4  | 1.4         | 1.1    | 0.8; 2.1   | 1.5               | 1.1    | 0.5; 2.2   |
| <i>Streptococcus salivarius</i>     | 0.5  | 0.3    | 0.1; 0.7  | 0.4         | 0.3    | 0.1; 0.5   | 0.3               | 0.1    | 0.1; 0.4   |
| <i>Mogibacterium pumilum</i>        | 0.2  | 0.1    | 0.0; 0.2  | 0.3         | 0.2    | 0.1; 0.5   | 0.0               | 0.0    | 0.0; 0.0   |
| <i>Prevotella intermedia</i>        | 0.9  | 0.1    | 0.0; 0.6  | 1.8         | 0.2    | 0.0; 1.1   | 0.8               | 0.1    | 0.0; 0.5   |
| <i>Prevotella nigrescens</i>        | 1.2  | 0.1    | 0.0; 1.2  | 0.8         | 0.4    | 0.1; 0.9   | 0.8               | 0.3    | 0.2; 0.9   |

\*Species identification only possible after performing sequence comparisons using the National Center for Biotechnology Information Basic Local Alignment Tool (NCBI BLAST, Maryland, USA) .

Definition of abbreviations: bronchoalveolar lavage; Q1: first quartile; Q3: third quartile.

**Table S4:** Relative abundance and frequency data of pathogenic genera in each microbiome compartment based on oral and lower airways samples collected from healthy subjects (n=25).

| Taxon                 | MICROBIOME COMPARTMENT |              |             |             |                   |             | Statistics      |
|-----------------------|------------------------|--------------|-------------|-------------|-------------------|-------------|-----------------|
|                       | Bronchial brushings    |              | BAL samples |             | Oral wash samples |             |                 |
| Genus                 | Median                 | Observed in  | Median      | Observed in | Median            | Observed in | <i>p-value*</i> |
| <i>Moraxella</i>      | 0.0%                   | 2/25 (8.0%)  | 0.0%        | 1/25 (4.0%) | 0.0%              | 1/25 (4.0%) | <0.001          |
| <i>Pseudomonas</i>    | 0.0%                   | 4/25 (16.0%) | 0.0%        | 2/25 (8.0%) | 0.0%              | 0/25 (0.0%) | <0.001          |
| <i>Acinetobacter</i>  | 0.0%                   | 5/25 (20.0%) | 0.0%        | 0/25 (0.0%) | 0.0%              | 0/25 (0.0%) | <0.001          |
| <i>Staphylococcus</i> | 0.0%                   | 5/25 (20.0%) | 0.0%        | 0/25 (0.0%) | 0.0%              | 0/25 (0.0%) | <0.001          |

Definition of abbreviations: BAL = bronchoalveolar lavage.

\*P-values were calculated using a Fisher's exact test.

**Table S5:** Baseline characteristics of participants recruited into the British Columbia Cancer Agency (BCCA) cohort (n=47) [7].

| <b>Variables</b> | <b>Results</b> |
|------------------|----------------|
| Age, years       | 62.9 ± 7.8     |
| Sex, female      | 22 (46.8)      |
| Smoking status   |                |
| Current smokers  | 20 (42.5)      |
| Former smokers   | 24 (51.1)      |
| Never-smokers    | 3 (6.4)*       |
| Pack-years       | 47.0 ± 13.9    |
| COPD status      |                |
| COPD             | 24 (51.1)      |
| Non-COPD         | 23 (48.9)      |

Values are expressed as mean ± SD or n (%). Definition of abbreviations: COPD = Chronic Obstructive Pulmonary Disease.

\*Out of the three never-smokers, two were non-COPD.



## References

1. Bolyen E, Rideout JR, Dillon MR, Bokulich NA, Abnet CC, Al-Ghalith GA, et al. Reproducible, interactive, scalable and extensible microbiome data science using QIIME 2. *Nat Biotechnol.* 2019;37(8):852-7.
2. Davis NM, Proctor DM, Holmes SP, Relman DA, Callahan BJ. Simple statistical identification and removal of contaminant sequences in marker-gene and metagenomics data. *Microbiome.* 2018;6(1):226.
3. Dixon P. VEGAN, a package of R functions for community ecology. *Journal of Vegetation Science.* 2003;14(6):927-30.
4. Chen J, Bittinger K, Charlson ES, Hoffmann C, Lewis J, Wu GD, et al. Associating microbiome composition with environmental covariates using generalized UniFrac distances. *Bioinformatics.* 2012;28(16):2106-13.
5. Anderson MJ. A new method for non-parametric multivariate analysis of variance. *Austral Ecology.* 2001;26(1):32-46.
6. Benjamini Y, Hochberg Y. Controlling the False Discovery Rate: A Practical and Powerful Approach to Multiple Testing. *Journal of the Royal Statistical Society: Series B (Methodological).* 1995;57(1):289-300.
7. Marshall EA, Filho FSL, Sin DD, Lam S, Leung JM, Lam WL. Distinct bronchial microbiome precedes clinical diagnosis of lung cancer. *Mol Cancer.* 2022;21(1):68.
